# Supplementary material for: mitch: multi-contrast pathway enrichment for multi-omics and single-cell profiling data
Source: PubMed Central journal article supplement (PMC7325150; doi:10.1186/s12864-020-06856-9), 2020-06-29
Supplement: 12864_2020_6856_MOESM1_ESM.pdf [file 12864_2020_6856_MOESM1_ESM.pdf]

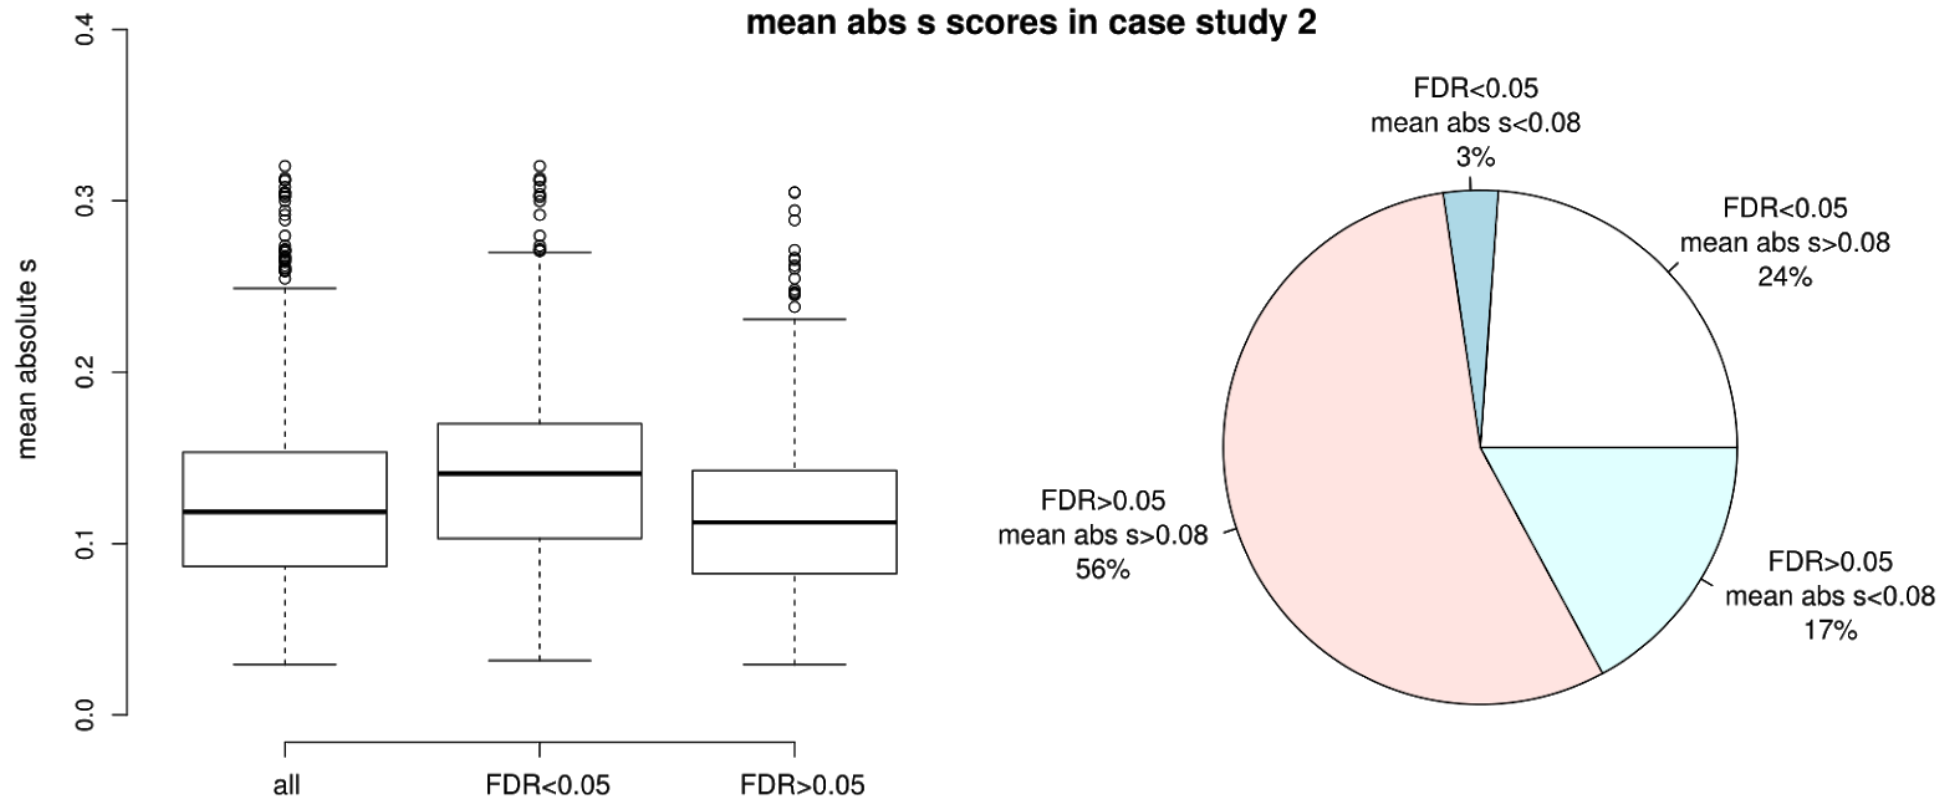

**Supplementary Figure 1. Mean absolute s scores in case study 2.** Results of the multi-omics analysis shown in Figure 3 underwent filtering based on a 5% FDR threshold before calculating the mean absolute s values in the six-dimensional analysis (left). Next, the number of gene sets with mean absolute s values greater or lower than 0.08 was counted (right) as below this level, match precision is lower than expected.
